# Supplementary material for: Reliability of Quantitative Real-Time PCR for Bacterial Detection in Cystic Fibrosis Airway Specimens
Source: PLoS One. 2010 Nov 30;5(11):e15101. doi: 10.1371/journal.pone.0015101 (PMC2994853; doi:10.1371/journal.pone.0015101)
Supplement: Table S4 — Prevotella cross-reactivity data. Equal mixtures of P. melanogenica, P. oris, P. denticola and F. nucleatum were analyzed with qPCR assays for Prevotella spp.. Fusobacterium nucleatum standards were run on all plates. (XLS) [file pone.0015101.s004.xls]

## Sheet: Sheet1
Table S4. Prevotella cross-reactivity data. Equal mixtures of P. melanogenica, P. oris, P. denticola and F. nucleatum were analysed with qPCR assays for Prevotella spp.. Fusobacterium nucleatum standards were run on all plates.
Total DNA	Amount DNA per species	P. melaninogenica qPCR assay results (copies/ reaction)	Difference between expected and detected	% excess DNA detected	F. nucleatum standard (copies/ reaction)	P. oris qPCR assay results (copies/reaction)	Difference between expected and detected	% excess DNA detected	F. nucleatum standard (copies/ reaction)	P. denticola qPCR assay results (copies/ reaction)	Difference between expected and detected	% excess DNA detected	F. nucleatum standard (copies/ reaction)
100000000	25000000	55400000	30400000	1.216	32.9	54100000	29100000	1.164	0	48300000	23300000	0.932	391
10000000	2500000	2410000	-90000	-0.036	0	2120000	-380000	-0.152	0	2280000	-220000	-0.088	50.4
1000000	250000	252000	2000	0.008	0	255000	5000	0.02	0	207000	-43000	-0.172	40.2
100000	25000	28203	3203	0.12812	0	18346	-6654	-0.26616	0	20303	-4697	-0.18788	33.5
10000	2500	2570	70	0.028	0	2246	-254	-0.1016	0	1993	-507	-0.2028	33.2
1000	250	226	-24	-0.096	0	219	-31	-0.124	0	224	-26	-0.104	35.7
100	25	51.6	26.6	1.064	0	54.2	29.2	1.168	0	52.2	27.2	1.088	32.7
